# Supplementary material for: Polycomb Repressive Complex 2 in Eukaryotes—An Evolutionary Perspective
Source: MDPI journal article supplement (doi:10.3390/epigenomes6010003), 2022-01-17
Supplement: s1 [file s1]

**Table S1. PRC2 core components in different species**

(Abbreviations: E(z) - Enhancer of zeste, Su(z)12 - Suppressor of zeste 12, ESC - Extra sex combs, Nurf55 - Nucleosome remodelling factor (also called p55), MSI - Multicopy Suppressor of IRA, MEZ - Maize Enhancer of zeste-like, CLF - CURLY LEAF, SWN - SWINGER, MEA - MEDEA, EMF2 - EMBRYONIC FLOWER 2, FIS2 - FERTILIZATION INDEPENDENT SEED 2, VRN2 - VERNALIZATION 2, FIE- FERTILIZATION INDEPENDENT ENDOSPERM, ESCL - ESC-like, MES- Maternal-Effect sterile, RBBP- Retinoblastoma Binding Protein, RbAp-Retinoblastoma Associated protein CAF1 - Chromatin Assembly Factor 1, NPF - *Neurospora* homolog of *Drosophila* P55 and mammalian P48.). Percentage identity/similarity (based on EMBOSS Needle[1]) to the *Drosophila melanogaster* PRC2 subunits are given in brackets (only full-length sequences available in the NCBI GenBank were used).

| Supergroups    | Eukaryotic group/Kingdom    | Phylum or Class            | Species                                                    | E(z) homolog                                                | Su(z) homolog                                              | Esc homolog                                                            | p55 homolog                            | References |
|----------------|-----------------------------|----------------------------|------------------------------------------------------------|-------------------------------------------------------------|------------------------------------------------------------|------------------------------------------------------------------------|----------------------------------------|------------|
| Archaeplastida | Eukaryota                   | Rhodophyta                 | <i>Cyanidioschyzon merolae</i>                             | CmE(z)<br>(24.3/ 37.6)                                      | CmSu(z)12                                                  | CmESC                                                                  | p55 (2)<br>(46.3/63.0)                 | [2]        |
|                | Viridiplantae               | Chlorophyta                | <i>Ostreococcus lucimarinus</i>                            | OIKMT6A2<br>(20.1/29.8)                                     | OIEMF2                                                     | OIFIE                                                                  | OIMSI1, OIMSI4<br>(59.1/73.0)          | [3]        |
|                |                             |                            | <i>Chlamydomonas reinhardtii</i>                           | CrE(z)/CrKMT6A2<br>(22.2/33.0)                              | CrEMF2<br>(12.1/21.5)                                      | CrESC.1/2 or CrFIE<br>(26.6/39.9)                                      | CrMSI1 (59.6/74.5)<br>CrMSI4           | [2,3]      |
|                |                             |                            | <i>Volvox carteri</i>                                      | VcKMT6A1;<br>VcKMT6A3                                       | -                                                          | VcFIE                                                                  | VcMSI1 (61.5/74.9)<br>VcMSI4           | [3]        |
|                | Viridiplantae - Embryophyta | Bryophyta - Bryopsida      | <i>Physcomitrium patens</i><br>(Moss)                      | PpCLF<br>(22.5/31.1)                                        | PpEMF2a,<br>PpEMF2b,<br>PpEMF2c<br>(13.1/22.4)             | PpFIE<br>(31.9/50.0)                                                   | PpMSI1 (64.7/79.8),<br>PpMSI4          | [3–6]      |
|                |                             | Lycophyte - Lycopodiopsida | <i>Selaginella moellendorffii</i><br>(primitive spikemoss) | SmKMT6A 1a<br>SmKMT6A 1b<br>(CLF like)<br>(21.9/32.6)       | SdEMF2p,<br>SdEMF2p_1<br>(13.6/22.7)                       | SmFIE<br>(34.5/52.1)                                                   | SmMSI1 (62.3/74.9)<br>SmMSI2a, SmMSI2b | [3,6,7]    |
|                |                             | Gymnosperm                 | <i>Picea abies</i>                                         | E(z) (CLF)                                                  | ?                                                          | ?                                                                      | ?                                      | [8]        |
|                |                             | Angiosperms - Monocot      | <i>Oryza sativa</i> (Rice)                                 | OsIEZ1 (OsSWN)<br>(21.3/32.6),<br>OsCLF (23.8/36.4)         | OsEMF2a,<br>OsEMF2b<br>(13.6/24.0)                         | OsFIE1<br>(32.5/47.8),<br>OsFIE2                                       | OsMSI1 (62.4/76.8),<br>OsMSI2,         | [7,9–12]   |
|                |                             |                            | <i>Triticum aestivum</i><br>(Bread wheat)                  | TaE(z)-4A1,<br>TaE(z)-7A1.1,<br>TaE(z)-7A1.2<br>(24.4/36.9) | TaSu(z)-2A1,<br>TaSu(z)-2A2,<br>TaSu(z)-5A1<br>(16.0/27.8) | TaFIE-7A1,<br>TaFIE-7A2.1,<br>TaFIE-7A2.2,<br>TaFIE-4A1<br>(34.0/51.9) | TaMSI1-A1,<br>TaMSI1-A2<br>(62.4/77.0) | [13]       |
|                |                             |                            | <i>Zea mays</i> (Maize)                                    | ZmMEZ1 (CLF)<br>(22.2/34.8),<br>ZmMEZ2 (SWN1)               | ZmEMF2a/2-1,<br>ZmEMF2b/2-2<br>(15.1/26.8)                 | ZmFIE1, ZmFIE2<br>(33.7/49.2)                                          | ZmMSI1-1<br>(62.4/77.4),<br>ZmMSI1-2,  | [10]       |

|                |                                         |                                |                                                         |                                                                                    |                                                                                                |                                          |                                                    |            |
|----------------|-----------------------------------------|--------------------------------|---------------------------------------------------------|------------------------------------------------------------------------------------|------------------------------------------------------------------------------------------------|------------------------------------------|----------------------------------------------------|------------|
|                |                                         |                                |                                                         | (24.1/36.9),<br>ZmMEZ3 (SWN2)                                                      |                                                                                                |                                          | ZmMSI1-3,<br>ZmMSI1-4,<br>ZmMSI2                   |            |
|                |                                         |                                | <i>Brachypodium distachyon</i><br>(Model grass)         | BdEZL1 (CLF<br>ortholog, BdCLF)<br>(27.6/41.6),<br>BdEZL2 (SWN<br>ortholog, BdSWN) | BdEMF2a,<br>BdEMF2b<br>(14.8/23.6)                                                             | BdFIE1, bdFIE2,<br>bdFIE3<br>(33.8/51.2) | BdMSI1a (62.1/77.4),<br>BdMSI1b, BdMSI3,<br>BdMSI4 | [3,14,15]  |
|                |                                         |                                | <i>Hordeum vulgare</i> (Barley)                         | HvCLF1, HvCLF2,<br>HvSWN<br>(25.6/39.4)                                            | HvSu(z)12a<br>(HvEMF2a),<br>HvSu(z)12b<br>(HvEMF2b),<br>HvSu(z)12c<br>(HvEMF2c)<br>(15.6/27.5) | HvFIE<br>(26.8/41.5)                     | HvMSI1 (62.4/76.8),<br>HvMSI2                      | [10,16,17] |
|                |                                         |                                | <i>Sorghum bicolor</i>                                  | SbCLF (20.6/32.2),<br>SbSWN                                                        | SbEMF2a<br>(15.2/25.3),<br>SbEMF2b,<br>SbEMF2c                                                 | SbFIE1, SbFIE2<br>(28.2/43.3)            | SbMSI1 (63.0/77.4),<br>SbMSI2                      | [10]       |
|                |                                         | Angiosperms -<br>Eudicot       | <i>Arabidopsis thaliana</i>                             | CLF (23.7/36.6),<br>SWN (24.8/37.4),<br>MEA (26.0/38.2)                            | EMF2 (15.0/26.8),<br>FIS2 (14.4/25.0),<br>VRN2 (10.5/17.9)                                     | FIE<br>(33.3/50.5)                       | MSI1 (62.9/77.3),<br>MSI2, MSI3, MSI4,<br>MSI5     | [18]       |
| Chromalveolata | SAR-Stramenopiles                       | Bacillariophyceae<br>(diatoms) | <i>Phaeodactylum tricornutum</i>                        | Ez                                                                                 | Suz12                                                                                          | Esc                                      | Nurf55(p55)<br>(48.2/61.9)                         | [3,19]     |
|                | SAR - Alveolata                         | Ciliophora/<br>ciliates        | <i>Paramecium tetraurelia</i>                           | Ez1p<br>(20.3/36.0), Ez2p                                                          | -                                                                                              | -                                        | Nurf55 (47.0/62.8)                                 | [20–22]    |
|                |                                         |                                | <i>Tetrahymena thermophila</i>                          | EZL1 (E(z)-like 1)<br>(18.5/31.0)                                                  | SUZ12                                                                                          | ESC1                                     | RebL1<br>(47.5/65.1)                               | [23,24]    |
| Opisthokonta   | Fungi                                   | Basidiomycota                  | <i>Cryptococcus neoformans</i>                          | Ezh2 (20.8/30.8)                                                                   | -                                                                                              | Eed1 (20.5/31.3)                         | Msl1 (51.5/67.7)                                   | [25,26]    |
|                |                                         | Ascomycota                     | <i>Fusarium graminearum</i> /<br><i>Gibberella zeae</i> | SET-7/KMT6<br>(13.4/22.3)                                                          | Suz12                                                                                          | EED<br>(19.5/31.0)                       | MSL1 (43.9/62.1),<br>CAF1-3                        | [26,27]    |
|                |                                         |                                | <i>Chaetomium thermophilum</i>                          | Ezh2 (11.3/19.2)                                                                   | Su(z)12                                                                                        | EED<br>(17.0/27.4)                       | p55<br>(45.4/66.5)                                 | [28,29]    |
|                |                                         |                                | <i>Neurospora crassa</i>                                | SET-7 (KMT6)<br>(11.7/18.9)                                                        | SUZ12<br>(15.0/25.1)                                                                           | EED<br>(16.2/25.6)                       | NPF (p55)<br>(44.8/64.4)                           | [26,30,31] |
|                |                                         |                                | <i>Saccharomyces cerevisiae</i>                         | -                                                                                  | -                                                                                              | -                                        | -                                                  | [22,32]    |
|                | Filasterea- single-<br>celled eukaryote | Capsaspora                     | <i>Capsaspora owczarzaki</i>                            | -                                                                                  | -                                                                                              | -                                        | -                                                  | [33]       |
|                | Animalia/animals                        | Porifera                       | <i>Amphimedon queenslandica</i>                         | E(z) (4 copies)                                                                    | Su(z)12<br>(17.0/24.7)                                                                         | ESC, ESCL                                | Nurf55                                             | [34]       |
|                |                                         | Cnidaria/<br>Hydrozoa          | <i>Hydra vulgaris</i> (swiftwater<br>hydra)             | HyEZH2                                                                             | Su(z)12-like<br>(predicted)<br>(20.5/35.3)                                                     | HyEED (42.7/62.1)                        | RBBP7                                              | [35–38]    |

|  |  |                        |                                                       |                                      |                      |                       |                                         |         |
|--|--|------------------------|-------------------------------------------------------|--------------------------------------|----------------------|-----------------------|-----------------------------------------|---------|
|  |  | Insecta/<br>insects    | <i>Drosophila melanogaster</i>                        | E(z)<br>(100/100)                    | Su(z)12<br>(100/100) | Esc/Escl<br>(100/100) | p55 (Nurf55)<br>(100/100)               | [39–41] |
|  |  | Nematoda/<br>nematodes | <i>Caenorhabditis elegans</i>                         | MES-2<br>(22.6/33.5)                 | -                    | MES-6<br>(23.4/36.9)  | -                                       | [42,43] |
|  |  | Reptilia/<br>reptiles  | <i>Anolis carolinensis</i><br>(green anole/chameleon) | AcEZH2<br>(52.1/62.2)                | SUZ12<br>(26.1/38.2) | EED<br>(46.4/63.9)    | RBBP4                                   | [44–47] |
|  |  | Mammalia/<br>mammals   | <i>Homo sapiens</i>                                   | EZH1(50.3/63.2),<br>EZH2 (53.5/63.8) | SUZ12<br>(28.8/42.6) | EED<br>(47.8/66.6)    | RBBP4/7 (RbAp48<br>/RbAp46) (87.8/93.8) | [48,49] |
|  |  |                        | <i>Mus musculus (Mouse)</i>                           | EZH1(49.9/62.9),<br>EZH2 (54.3/64.4) | SUZ12<br>(28.3/42.0) | EED<br>(48.2/66.7)    | RbAp48<br>(87.5/93.5)                   | [50,51] |

**Table S2.** A general overview at the distribution of H3K27me3 and its putative functions across various studied species.

| Supergroups    | Eukaryotic group/<br>Kingdom   | Phylum or Class                       | Species                          | H3K27me3 distribution                                                                | H3K27me3 distribution<br>related to H3K9me2/3<br>and/or DNA methylation                     | Proposed function                                                                         | References |
|----------------|--------------------------------|---------------------------------------|----------------------------------|--------------------------------------------------------------------------------------|---------------------------------------------------------------------------------------------|-------------------------------------------------------------------------------------------|------------|
| Archaeplastida | Eukaryota                      | Rhodophyta                            | <i>Cyanidioschyzon merolae</i>   | Telomeric and subtelomeric regions (4% annotated genes and 50 % repetitive elements) | Unknown                                                                                     | Regulate gene repression especially associated with Intein-mediated splicing of proteins. | [2]        |
|                | Viridiplantae                  | Chlorophyta                           | <i>Chlamydomonas reinhardtii</i> | H3K27me3 absent or present in very low levels                                        | No effect on K9me1/3 or DNA methylation                                                     | Repression of repetitive genomic elements                                                 | [22]       |
|                | Viridiplantae -<br>Embryophyta | Bryophyta - Bryopsida                 | <i>Physcomitrium patens</i>      | Genes (preference for shorter genes)                                                 | Non-overlapping                                                                             | Repression of apogamy                                                                     | [4,5,52]   |
|                |                                | Marchantiophyta-<br>Marchantiopsida   | <i>Marchantia polymorpha</i>     | 10% annotated genes and 20 % in repetitive elements                                  | Non-overlapping                                                                             | Repression of genes and repeats (TEs)                                                     | [53]       |
|                |                                | Pinophyta – Pinopsida<br>(Gymnosperm) | <i>Picea abies</i>               | Genes-uniformly distributed,<br>additionally clustered in the mid<br>arm position    | Unknown                                                                                     | Embryogenesis, cell-fate determination                                                    | [8,54]     |
|                |                                |                                       | <i>Pinus sylvestris</i>          |                                                                                      | Unknown                                                                                     |                                                                                           |            |
|                |                                | Angiosperms -Eudicot                  | <i>Arabidopsis thaliana</i>      | 20% – 30% annotated genes<br>(domains <1kb)                                          | Mutually exclusive,<br>H3K27me3 spreading into<br>H3K9me2-regions upon<br>DNA demethylation | Development, phase transitions                                                            | [55–62]    |

|                |                   |                                       |                                                     |                                                                                             |                                                                                                                                                         |                                                                                                                                              |            |
|----------------|-------------------|---------------------------------------|-----------------------------------------------------|---------------------------------------------------------------------------------------------|---------------------------------------------------------------------------------------------------------------------------------------------------------|----------------------------------------------------------------------------------------------------------------------------------------------|------------|
| Chromalveolata | SAR-Stramenopiles | Bacillariophyceae (diatoms)           | <i>Phaeodactylum tricornutum</i>                    | 7% annotated genes, 41% annotated TE and intergenic region                                  | H3K27me3, H3K9me2/3, and DNA methylation coexist (H3K27me3 overlap with H3K9me2)                                                                        | Transcriptional silencing (role in signal transduction, development and cell cycle control; morphology/cell differentiation)                 | [19,63]    |
|                |                   | Ochrophyta-Phaeophyceae               | <i>Ectocarpus</i>                                   | H3K27me3 present but distribution unknown                                                   | Unknown                                                                                                                                                 | Unknown                                                                                                                                      | [64]       |
|                | SAR - Alveolata   | Cilliophora/ciliates (Chromalveolata) | <i>Tetrahymena thermophila</i>                      | micronucleus (K27&K9me1/2/3); macronucleus especially anlagen                               | Co-exist                                                                                                                                                | Developmental regulation and foreign DNA elimination during somatic differentiation, macronucleus differentiation                            | [65,66]    |
|                |                   |                                       | <i>Paramecium tetraurelia</i>                       | Newly developing macronucleus                                                               | Co-exist- H3K27me3 and H3K9me3 co-occur at TEs                                                                                                          | Control RNAi, Transcriptional silencing of transposable elements (for the development of sexually viable progeny and the elimination of DNA) | [21]       |
| Opisthokonta   | Fungi             | Basidiomycota                         | <i>Cryptococcus neoformans</i>                      | Subtelomeres - broad domains (average 41 kb). On repetitive elements cover 5% of the genome | Redistribution to centromeric H3K9me2-marked regions upon disruption of H3K27me3-marked chromatin binding; redistribution depends on H3K9me2 deposition | Dispensable for normal growth and development                                                                                                | [25]       |
|                |                   | Ascomycota                            | <i>Neurospora crassa</i>                            | Subtelomeres and telomeres, including genes (broad domain-~12.5 kb)                         | H3K27me3 and H3K9me3 form distinct domains at telomeric regions (adjacent, but no overlap)                                                              | Developmental regulations                                                                                                                    | [30,31,67] |
|                |                   |                                       | <i>Saccharomyces cerevisiae</i> and <i>S. pombe</i> | Lacks H3K27 methylation                                                                     | -                                                                                                                                                       | -                                                                                                                                            | [68]       |
|                |                   |                                       | <i>Candida albicans</i>                             | Lacks H3K27 methylation                                                                     | -                                                                                                                                                       | -                                                                                                                                            | [68]       |
|                | Animalia/animals  | Porifera                              | <i>Amphimedon queenslandica</i>                     | Gene bodies                                                                                 | Unknown                                                                                                                                                 | Developmental regulatory genes                                                                                                               | [34]       |
|                |                   | Insecta/insects                       | <i>Drosophila melanogaster</i>                      | Genes (broad domains ~70kb)                                                                 | H3K27me3 deposition is independent from DNA methylation.<br><br>Non-overlapping or antagonistic relationship                                            | Gene silencing or facultative heterochromatin formation (Developmental gene regulation)                                                      | [69]       |

|  |                    |                               |                                                                                |                                                                                                             |                                                   |            |  |
|--|--------------------|-------------------------------|--------------------------------------------------------------------------------|-------------------------------------------------------------------------------------------------------------|---------------------------------------------------|------------|--|
|  |                    |                               |                                                                                |                                                                                                             | between H3K27me3 and H3K36me2/3 (De et al., 2020) |            |  |
|  | Nematoda/nematodes | <i>Caenorhabditis elegans</i> | X-chromosome, H3K27me3 levels are higher on arm regions compared to the centre | H3K9me3-marked chromatin coincides with H3K27me3. Antagonistic relationship between H3K27me3 and H3K36me2/3 | Germline development, repression of X-chromosome  | [43,70–72] |  |
|  | Mammalia/mammals   | Mus musculus, Homo sapiens    | Genes, telomeres (Broad domains (~43kb))                                       | H3K27me3 and H3K9me3 distributions are mutually exclusive.                                                  | Developmental gene regulation                     | [73,74]    |  |

## References

1. EMBOSS Needle. Available Online: [https://www.ebi.ac.uk/Tools/Psa/Emboss\\_needle/](https://www.ebi.ac.uk/Tools/Psa/Emboss_needle/).
2. Mikulski, P.; Komarynets, O.; Fachinelli, F.; Weber, A.P.M.; Schubert, D. Characterization of the Polycomb-Group Mark H3K27me3 in Unicellular Algae. *Frontiers in Plant Science* **2017**, *8*, doi:10.3389/fpls.2017.00607.
3. Huang, Y.; Chen, D.H.; Liu, B.Y.; Shen, W.H.; Ruan, Y. Conservation and Diversification of Polycomb Repressive Complex 2 (PRC2) Proteins in the Green Lineage. *Brief Funct Genomics* **2016**, doi:10.1093/bfgp/elw007.
4. Okano, Y.; Aono, N.; Hiwatashi, Y.; Murata, T.; Nishiyama, T.; Ishikawa, T.; Kubo, M.; Hasebe, M. A Polycomb Repressive Complex 2 Gene Regulates Apogamy and Gives Evolutionary Insights into Early Land Plant Evolution. *Proceedings of the National Academy of Sciences of the United States of America* **2009**, *106*, 16321–16326, doi:10.1073/pnas.0906997106.
5. Mosquna, A.; Katz, A.; Decker, E.L.; Rensing, S.A.; Reski, R.; Ohad, N. Regulation of Stem Cell Maintenance by the Polycomb Protein FIE Has Been Conserved during Land Plant Evolution. *Development* **2009**, *136*, 2433–2444, doi:10.1242/dev.035048.
6. Chen, L.J.; Diao, Z.Y.; Specht, C.; Sung, Z.R. Molecular Evolution of VEF-Domain-Containing PcG Genes in Plants. *Molecular Plant* **2009**, *2*, 738–754, doi:10.1093/mp/ssp032.
7. Luo, M.; Platten, D.; Chaudhury, A.; Peacock, W.J.; Dennis, E.S. Expression, Imprinting, and Evolution of Rice Homologs of the Polycomb Group Genes. *Molecular Plant* **2009**, *2*, 711–723, doi:10.1093/mp/ssp036.
8. Nakamura, M.; Batista, R.A.; Köhler, C.; Hennig, L. Polycomb Repressive Complex 2-Mediated Histone Modification H3K27me3 Is Associated with Embryogenic Potential in Norway Spruce. *Journal of Experimental Botany* **2021**, *71*, 6366–6378, doi:10.1093/JXB/ERAA365.
9. Liu, X.; Zhou, C.; Zhao, Y.; Zhou, S.; Wang, W.; Zhou, D.X. The Rice Enhancer of Zeste [E(z)] Genes SDG711 and SDG718 Are Respectively Involved in Long Day and Short Day Signaling to Mediate the Accurate Photoperiod Control of Flowering Time. *Frontiers in Plant Science* **2014**, *5*, 1–9, doi:10.3389/fpls.2014.00591.
10. Ni, J.; Ma, X.; Feng, Y.; Tian, Q.; Wang, Y.; Xu, N.; Tang, J.; Wang, G. Updating and Interaction of Polycomb Repressive Complex 2 Components in Maize (Zea Mays). *Planta* **2019**, *250*, doi:10.1007/s00425-019-03193-4.
11. Conrad, L.J.; Khanday, I.; Johnson, C.; Guiderdoni, E.; An, G.; Vijayraghavan, U.; Sundaresan, V. The Polycomb Group Gene EMF2B Is Essential for Maintenance of Floral Meristem Determinacy in Rice. *The Plant Journal* **2014**, *80*, 883–894, doi:10.1111/tpj.12688.

12. Cheng, X.; Pan, M.; E, Z.; Zhou, Y.; Niu, B.; Chen, C. The Maternally Expressed Polycomb Group Gene OsEMF2a Is Essential for Endosperm Cellularization and Imprinting in Rice. *Plant Commun* **2020**, *2*, 100092–100092, doi:10.1016/j.xplc.2020.100092.
13. Strejčková, B.; Čegan, R.; Pecinka, A.; Milec, Z.; Šafář, J. Identification of Polycomb Repressive Complex 1 and 2 Core Components in Hexaploid Bread Wheat. *BMC Plant Biology* **2020**, *20*, 1–13, doi:10.1186/s12870-020-02384-6.
14. Higgins, J.A.; Bailey, P.C.; Laurie, D.A. Comparative Genomics of Flowering Time Pathways Using Brachypodium Distachyon as a Model for the Temperate Grasses. *PLoS ONE* **2010**, *5*, doi:10.1371/journal.pone.0010065.
15. Lomax, A.; Woods, D.P.; Dong, Y.; Bouché, F.; Rong, Y.; Mayer, K.S.; Zhong, X.; Amasino, R.M. An Ortholog of CURLY LEAF/ENHANCER OF ZESTE like-1 Is Required for Proper Flowering in Brachypodium Distachyon. *The Plant Journal* **2018**, *93*, 871–882, doi:10.1111/tpj.13815.
16. Kapazoglou, A.; Tondelli, A.; Papaefthimiou, D.; Ampatzidou, H.; Francia, E.; Stanca, M.A.; Bladenopoulos, K.; Tsiftaris, A.S. Epigenetic Chromatin Modifiers in Barley: IV. The Study of Barley Polycomb Group (PcG) Genes during Seed Development and in Response to External ABA. *BMC Plant Biology* **2010**, *10*, doi:10.1186/1471-2229-10-73.
17. Tonosaki, K.; Kinoshita, T. Possible Roles for Polycomb Repressive Complex 2 in Cereal Endosperm. *Frontiers in Plant Science* **2015**, *6*, 1–5, doi:10.3389/fpls.2015.00144.
18. Derkacheva, M.; Steinbach, Y.; Wildhaber, T.; Mozgová, I.; Mahrez, W.; Nanni, P.; Bischof, S.; Grisse, W.; Hennig, L. Arabidopsis MSI1 Connects LHP1 to PRC2 Complexes. *EMBO Journal* **2013**, *32*, 2073–2085, doi:10.1038/emboj.2013.145.
19. Zhao, X.; Deton Cabanillas, A.F.; Veluchamy, A.; Bowler, C.; Vieira, F.R.J.; Tirichine, L. Probing the Diversity of Polycomb and Trithorax Proteins in Cultured and Environmentally Sampled Microalgae. *Frontiers in Marine Science* **2020**, *7*, 1–17, doi:10.3389/fmars.2020.00189.
20. Rzesutek, I.; Maurer-Alcalá, X.X.; Nowacki, M. Programmed Genome Rearrangements in Ciliates. *Cellular and Molecular Life Sciences* **2020**, *77*, 4615–4629, doi:10.1007/s00018-020-03555-2.
21. Frapporti, A.; Miró Pina, C.; Arnaiz, O.; Holoch, D.; Kawaguchi, T.; Humbert, A.; Eleftheriou, E.; Lombard, B.; Loew, D.; Sperling, L.; et al. The Polycomb Protein Ezh1 Mediates H3K9 and H3K27 Methylation to Repress Transposable Elements in Paramecium. *Nature Communications* **2019**, *10*, 2710, doi:10.1038/s41467-019-10648-5.
22. Shaver, S.; Casas-Mollano, J.A.; Cerny, R.L.; Cerutti, H. Origin of the Polycomb Repressive Complex 2 and Gene Silencing by an E(z) Homolog in the Unicellular Alga Chlamydomonas. *Epigenetics* **2010**, *5*, 301–312.
23. Xu, J.; Zhao, X.; Mao, F.; Basur, V.; Ueberheide, B.; Chait, B.T.; David Allis, C.; Taverna, S.D.; Gao, S.; Wang, W.; et al. A Polycomb Repressive Complex Is Required for RNAi-Mediated Heterochromatin Formation and Dynamic Distribution of Nuclear Bodies. *Nucleic Acids Research* **2021**, *49*, 5407–5425, doi:10.1093/nar/gkaa1262.
24. Nabeel-Shah, S.; Garg, J.; Saettone, A.; Ashraf, K.; Lee, H.; Wahab, S.; Ahmed, N.; Fine, J.; Derynck, J.; Pu, S.; et al. Functional Characterization of RebL1 Highlights the Evolutionary Conservation of Oncogenic Activities of the RBBP4/7 Orthologue in Tetrahymena Thermophila. *Nucleic Acids Research* **2021**, *49*, 6196–6212, doi:10.1093/nar/gkab413.
25. Dumesic, P.A.; Homer, C.M.; Moresco, J.J.; Pack, L.R.; Shanle, E.K.; Coyle, S.M.; Strahl, B.D.; Fujimori, D.G.; Yates, J.R.; Madhani, H.D. Product Binding Enforces the Genomic Specificity of a Yeast Polycomb Repressive Complex. *Cell* **2015**, *160*, 204–218, doi:10.1016/j.cell.2014.11.039.
26. Ridenour, J.B.; Möller, M.; Freitag, M. Polycomb Repression without Bristles: Facultative Heterochromatin and Genome Stability in Fungi. *Genes* **2020**, *11*.
27. Connolly, L.R.; Smith, K.M.; Freitag, M. The Fusarium Graminearum Histone H3 K27 Methyltransferase KMT6 Regulates Development and Expression of Secondary Metabolite Gene Clusters. *PLoS Genetics* **2013**, *9*, doi:10.1371/journal.pgen.1003916.
28. Jiao, L.; Liu, X. Structural Analysis of an Active Fungal PRC2. *Nucleus* **2016**, *7*, 284–291, doi:10.1080/19491034.2016.1183849.
29. Jiao, L.; Liu, X. Structural Basis of Histone H3K27 Trimethylation by an Active Polycomb Repressive Complex 2. *Science* **2015**, *350*, doi:10.1126/science.aac4383.

30. Jamieson, K.; Rountree, M.R.; Lewis, Z.A.; Stajich, J.E.; Selker, E.U. Regional Control of Histone H3 Lysine 27 Methylation in *Neurospora*. *Proc Natl Acad Sci U S A* **2013**, *110*, 6027–6032, doi:10.1073/pnas.1303750110.
31. McNaught, K.J.; Wiles, E.T.; Selker, E.U. Identification of a PRC2 Accessory Subunit Required for Subtelomeric H3K27 Methylation in *Neurospora Crassa*. *Molecular and Cellular Biology* **2020**, *40*, doi:10.1128/MCB.00003-20.
32. Margueron, R.; Reinberg, D. The Polycomb Complex PRC2 and Its Mark in Life. *Nature* **2011**, *469*, 343–349.
33. Sebé-Pedrós, A.; Ballaré, C.; Parra-Acero, H.; Chiva, C.; Tena, J.J.; Sabidó, E.; Gómez-Skarmeta, J.L.; Di Croce, L.; Ruiz-Trillo, I. The Dynamic Regulatory Genome of *Capsaspora* and the Origin of Animal Multicellularity. *Cell* **2016**, *165*, 1224–1237, doi:10.1016/j.cell.2016.03.034.
34. Gaiti, F.; Jindrich, K.; Fernandez-Valverde, S.L.; Roper, K.E.; Degnan, B.M.; Tanurdžić, M. Landscape of Histone Modifications in a Sponge Reveals the Origin of Animal Cis-Regulatory Complexity. *eLife* **2017**, *6*, 1–33, doi:10.7554/eLife.22194.
35. Genikhovich, G.; Kürn, U.; Hemmrich, G.; Bosch, T.C.G. Discovery of Genes Expressed in Hydra Embryogenesis. *Developmental Biology* **2006**, *289*, 466–481, doi:10.1016/j.ydbio.2005.10.028.
36. Pillai, A.; Gungi, A.; Reddy, P.C.; Galande, S. Epigenetic Regulation in Hydra: Conserved and Divergent Roles. *Frontiers in Cell and Developmental Biology* **2021**, *9*, 1–23, doi:10.3389/fcell.2021.663208.
37. PREDICTED: Polycomb Protein Suz12-like [*Hydra Vulgaris*]. Available Online: [https://www.ncbi.nlm.nih.gov/protein/XP\\_012556196.1?Report=genbank&log\\$=prottop&blast\\_rank=1&RID=R2KAB9PA013](https://www.ncbi.nlm.nih.gov/protein/XP_012556196.1?Report=genbank&log$=prottop&blast_rank=1&RID=R2KAB9PA013) (Accessed on 21/10/2021).;
38. PREDICTED: Histone-Binding Protein RBBP7 [*Hydra Vulgaris*]. Available Online: [https://www.ncbi.nlm.nih.gov/protein/XP\\_012554465.1?Report=genbank&log\\$=prottop&blast\\_rank=1&RID=R2KUGECN013](https://www.ncbi.nlm.nih.gov/protein/XP_012554465.1?Report=genbank&log$=prottop&blast_rank=1&RID=R2KUGECN013) (Accessed on 21/10/2021).
39. Herz, H.-M.; Mohan, M.; Garrett, A.S.; Miller, C.; Casto, D.; Zhang, Y.; Seidel, C.; Haug, J.S.; Florens, L.; Washburn, M.P.; et al. Polycomb Repressive Complex 2-Dependent and -Independent Functions of Jarid2 in Transcriptional Regulation in *Drosophila*. *Molecular and Cellular Biology* **2012**, *32*, 1683–1693, doi:10.1128/mcb.06503-11.
40. Schwartz, Y.B.; Pirrotta, V. A New World of Polycombs: Unexpected Partnerships and Emerging Functions. *Nature Reviews Genetics* **2013**, *14*, 853–864, doi:10.1038/nrg3603.
41. Erokhin, M.; Gorbenko, F.; Lomaev, D.; Mazina, M.Y.; Mikhailova, A.; Garaev, A.K.; Parshikov, A.; Vorobyeva, N.E.; Georgiev, P.; Schedl, P.; et al. Boundaries Potentiate Polycomb Response Element-Mediated Silencing. *BMC Biology* **2021**, *19*, 1–20, doi:10.1186/s12915-021-01047-8.
42. Bender LB, Cao R, Zhang Y, S.S. The MES-2/MES-3/MES-6 Complex and Regulation of Histone H3 Methylation in *C. Elegans*. *Curr Biol.* **2004**, *14*, 1639–1643, doi:10.1016/j.cub.2004.08.062.
43. Gaydos, L.J.; Wang, W.; Strome, S. H3K27me and PRC2 Transmit a Memory of Repression across Generations and during Development. *Science* **2014**, *345*, 1515–1518, doi:10.1126/science.1255023.
44. Brooun, A.; Gajiwala, K.S.; Deng, Y.L.; Liu, W.; Bolaños, B.; Bingham, P.; He, Y.A.; Diehl, W.; Grable, N.; Kung, P.P.; et al. Polycomb Repressive Complex 2 Structure with Inhibitor Reveals a Mechanism of Activation and Drug Resistance. *Nature communications* **2016**, *7*, 11384, doi:10.1038/ncomms11384.
45. PREDICTED: LOW QUALITY PROTEIN: Polycomb Protein SUZ12 [*Anolis Carolinensis*]. Available Online: [https://www.ncbi.nlm.nih.gov/protein/XP\\_008112590.1?Report=genbank&log\\$=prottop&blast\\_rank=1&RID=R2PMHJ83016](https://www.ncbi.nlm.nih.gov/protein/XP_008112590.1?Report=genbank&log$=prottop&blast_rank=1&RID=R2PMHJ83016) (Accessed on 21/10/2021).
46. PREDICTED: Polycomb Protein EED [*Anolis Carolinensis*]. Available Online: [https://www.ncbi.nlm.nih.gov/protein/XP\\_003219406.1?Report=genbank&log\\$=prottop&blast\\_rank=1&RID=R2PDKH5B013](https://www.ncbi.nlm.nih.gov/protein/XP_003219406.1?Report=genbank&log$=prottop&blast_rank=1&RID=R2PDKH5B013) (Accessed on 21/10/2021).
47. PREDICTED: Histone-Binding Protein RBBP4 Isoform X2 [*Anolis Carolinensis*]. Available Online: [https://www.ncbi.nlm.nih.gov/protein/XP\\_003230003.3?Report=genbank&log\\$=prottop&blast\\_rank=1&RID=R2P2UE3N013](https://www.ncbi.nlm.nih.gov/protein/XP_003230003.3?Report=genbank&log$=prottop&blast_rank=1&RID=R2P2UE3N013) (Accessed on 21/10/2021).

48. Kasinath, V.; Faini, M.; Poepsel, S.; Reif, D.; Feng, X.A.; Stjepanovic, G.; Aebbersold, R.; Nogales, E. Structures of Human PRC2 with Its Cofactors AEBP2 and JARID2. *Science* **2018**, *359*, doi:10.1126/science.aar5700.
49. Holoch, D.; Margueron, R. Mechanisms Regulating PRC2 Recruitment and Enzymatic Activity. *Trends in Biochemical Sciences* **2017**, *42*, 531–542, doi:10.1016/j.tibs.2017.04.003.
50. Meng, T.G.; Zhou, Q.; Ma, X.S.; Liu, X.Y.; Meng, Q.R.; Huang, X.J.; Liu, H.L.; Lei, W.L.; Zhao, Z.H.; Ouyang, Y.C.; et al. PRC2 and EHMT1 Regulate H3K27me2 and H3K27me3 Establishment across the Zygote Genome. *Nature Communications* **2020**, *11*, 1–12, doi:10.1038/s41467-020-20242-9.
51. He, A.; Ma, Q.; Cao, J.; von Gise, A.; Zhou, P.; Xie, H.; Zhang, B.; Hsing, M.; Christodoulou, D.C.; Cahan, P.; et al. Polycomb Repressive Complex 2 Regulates Normal Development of the Mouse Heart. *Circulation Research* **2012**, *110*, 406–415, doi:10.1161/CIRCRESAHA.111.252205.
52. Widiez, T.; Symeonidi, A.; Luo, C.; Lam, E.; Lawton, M.; Rensing, S.A. The Chromatin Landscape of the Moss *Physcomitrella Patens* and Its Dynamics during Development and Drought Stress. *The Plant Journal* **2014**, *79*, 67–81, doi:10.1111/tpj.12542.
53. Montgomery, S.A.; Tanizawa, Y.; Galik, B.; Wang, N.; Ito, T.; Mochizuki, T.; Akimcheva, S.; Bowman, J.L.; Cognat, V.; Maréchal-Drouard, L.; et al. Chromatin Organization in Early Land Plants Reveals an Ancestral Association between H3K27me3, Transposons, and Constitutive Heterochromatin. *Current Biology* **2020**, *30*, 573–588.e7, doi:10.1016/j.cub.2019.12.015.
54. Fuchs, J.; Jovtchev, G.; Schubert, I. The Chromosomal Distribution of Histone Methylation Marks in Gymnosperms Differs from That of Angiosperms. *Chromosome Research* **2008**, *16*, 891–898, doi:10.1007/s10577-008-1252-4.
55. Dong, X.; Reimer, J.; Göbel, U.; Engelhorn, J.; He, F.; Schoof, H.; Turck, F. Natural Variation of H3K27me3 Distribution between Two Arabidopsis Accessions and Its Association with Flanking Transposable Elements. *Genome Biology* **2012**, *13*, doi:10.1186/gb-2012-13-12-r117.
56. Turck, F.; Roudier, F.; Farrona, S.; Martin-Magniette, M.L.; Guillaume, E.; Buisine, N.; Gagnot, S.; Martienssen, R.A.; Coupland, G.; Colot, V. Arabidopsis TFL2/LHP1 Specifically Associates with Genes Marked by Trimethylation of Histone H3 Lysine 27. *PLoS Genetics* **2007**, *3*, 0855–0866, doi:10.1371/journal.pgen.0030086.
57. Deleris, A.; Stroud, H.; Bernatavichute, Y.; Johnson, E.; Klein, G.; Schubert, D.; Jacobsen, S.E. Loss of the DNA Methyltransferase MET1 Induces H3K9 Hypermethylation at PcG Target Genes and Redistribution of H3K27 Trimethylation to Transposons in Arabidopsis Thaliana. *PLoS Genetics* **2012**, *8*, doi:10.1371/journal.pgen.1003062.
58. Weinhofer, I.; Hehenberger, E.; Roszak, P.; Hennig, L.; Köhler, C. H3K27me3 Profiling of the Endosperm Implies Exclusion of Polycomb Group Protein Targeting by DNA Methylation. *PLoS Genetics* **2010**, *6*, 1–14, doi:10.1371/journal.pgen.1001152.
59. Moreno-Romero, J.; Jiang, H.; Santos-González, J.; Köhler, C. Parental Epigenetic Asymmetry of PRC 2-mediated Histone Modifications in the Arabidopsis Endosperm. *The EMBO Journal* **2016**, *35*, 1298–1311, doi:10.15252/embj.201593534.
60. Schubert, D. Evolution of Polycomb-Group Function in the Green Lineage. *F1000Research* **2019**, *8*, 268, doi:10.12688/f1000research.16986.1.
61. Zervudacki, J.; Yu, A.; Amesefe, D.; Wang, J.; Drouaud, J.; Navarro, L.; Deleris, A. Transcriptional Control and Exploitation of an Immune-Responsive Family of Plant Retrotransposons. *EMBO J* **2018**, *37*, e98482, doi:10.15252/embj.201798482.
62. Vaquero-Sedas, M.I.; Vega-Palas, M.A. Differential Association of Arabidopsis Telomeres and Centromeres with Histone H3 Variants. *Scientific Reports* **2013**, *3*, 1202, doi:10.1038/srep01202.
63. Veluchamy, A.; Rastogi, A.; Lin, X.; Lombard, B.; Murik, O.; Thomas, Y.; Dingli, F.; Rivarola, M.; Ott, S.; Liu, X.; et al. An Integrative Analysis of Post-Translational Histone Modifications in the Marine Diatom *Phaeodactylum Tricornutum*. *Genome Biology* **2015**, *16*, 102, doi:10.1186/s13059-015-0671-8.
64. Bourdareau, S.; Tirichine, L.; Lombard, B.; Loew, D.; Scornet, D.; Wu, Y.; Coelho, S.M.; Cock, J.M. Histone Modifications during the Life Cycle of the Brown Alga *Ectocarpus*. *Genome Biology* **2021**, *22*, 1–27, doi:10.1186/s13059-020-02216-8.
65. Liu, Y.; Taverna, S.D.; Muratore, T.L.; Shabanowitz, J.; Hunt, D.F.; Allis, C.D. RNAi-Dependent H3K27 Methylation Is Required for Heterochromatin Formation and DNA Elimination in *Tetrahymena*. *Genes and Development* **2007**, *21*, 1530–1545, doi:10.1101/gad.1544207.



66. Chung, P.H.; Yao, M.C. Tetrahymena Thermophila JMJD3 Homolog Regulates H3K27 Methylation and Nuclear Differentiation. *Eukaryotic Cell* **2012**, *11*, 601–614, doi:10.1128/EC.05290-11.
67. Jamieson, K.; McNaught, K.J.; Ormsby, T.; Leggett, N.A.; Honda, S.; Selker, E.U. Telomere Repeats Induce Domains of H3K27 Methylation in Neurospora. *eLife* **2018**, *7*, 1–18, doi:10.7554/eLife.31216.
68. Freitag, M. Histone Methylation by SET Domain Proteins in Fungi. *Annual Review of Microbiology* **2017**, *71*.
69. De, S.; Gehred, N.D.; Fujioka, M.; Chan, F.W.; Jaynes, J.B.; Kassis, J.A. Defining the Boundaries of Polycomb Domains in Drosophila. *Genetics* **2020**, *216*, 689–700, doi:10.1534/genetics.120.303642.
70. Ahringer, J.; Gasser, S.M. Repressive Chromatin in Caenorhabditis Elegans: Establishment, Composition, and Function. *Genetics* **2018**, *208*, 491–511, doi:10.1534/genetics.117.300386.
71. Gaydos, L.; Rechtsteiner, A.; Egelhofer, T.; Carroll, C.; Strome, S. Antagonism between MES-4 and Polycomb Repressive Complex 2 Promotes Appropriate Gene Expression in C. Elegans Germ Cells. *Cell Rep.* **2012**, *2*, 1169–1177, doi:doi:10.1016/j.celrep.2012.09.019.
72. Liu, T.; Rechtsteiner, A.; Egelhofer, T.A.; Vielle, A.; Latorre, I.; Cheung, M.-S.; Ercan, S.; Ikegami, K.; Jensen, M.; Kolasinska-Zwierz, P.; et al. Broad Chromosomal Domains of Histone Modification Patterns in C. Elegans. *Genome Res* **2011**, *21*, 227–236, doi:10.1101/gr.115519.110.
73. Pauler, F.M.; Sloane, M.A.; Huang, R.; Regha, K.; Koerner, M.V.; Tamir, I.; Sommer, A.; Aszodi, A.; Jenuwein, T.; Barlow, D.P. H3K27me3 Forms BLOCs over Silent Genes and Intergenic Regions and Specifies a Histone Banding Pattern on a Mouse Autosomal Chromosome. *Genome Research* **2009**, *19*, 221–233, doi:10.1101/gr.080861.108.
74. Cai, Y.; Zhang, Y.; Loh, Y.P.; Tng, J.Q.; Lim, M.C.; Cao, Z.; Raju, A.; Lieberman Aiden, E.; Li, S.; Manikandan, L.; et al. H3K27me3-Rich Genomic Regions Can Function as Silencers to Repress Gene Expression via Chromatin Interactions. *Nature Communications* **2021**, *12*, doi:10.1038/s41467-021-20940-y.
